# Supplementary material for: A family of powerful halogen-bond donors: a structural and theoretical analysis of triply activated 3-iodo-1-phenylprop-2-yn-1-ones
Source: Royal Society of Chemistry journal article supplement (doi:10.1039/d1ce01583d), 2021-12-20
Supplement: d1ce01583d1.pdf [file d1ce01583d1.pdf]

# **“A family of powerful halogen-bond donors: A structural and theoretical analysis of triply activated 3-iodo-1-phenylprop-2-yn-1-ones”**

Vinu V. Panikkattu,<sup>a</sup> Abhijeet S. Sinha<sup>a</sup> and Christer B. Aakeröy.<sup>a\*</sup>

<sup>a</sup>Department of Chemistry, Kansas State University, Manhattan, KS 66506;

Supplementary information

# Table of Contents

|      |                                                                             |    |
|------|-----------------------------------------------------------------------------|----|
| 1    | General Remarks .....                                                       | 3  |
| 2    | Synthetic procedures .....                                                  | 3  |
| 2.1  | 1-phenyl-3-(trimethylsilyl)prop-2-yn-1-one ( <b>US-I2</b> ).....            | 4  |
| 2.2  | 3-iodo-1-phenylprop-2-yn-1-one ( <b>US</b> ) .....                          | 4  |
| 2.3  | 1-(4-fluorophenyl)-3-(trimethylsilyl)prop-2-yn-1-one ( <b>4F-I2</b> ) ..... | 5  |
| 2.4  | 1-(4-fluorophenyl)-3-iodoprop-2-yn-1-one ( <b>4F</b> ).....                 | 5  |
| 2.5  | 3-(3-(trimethylsilyl)propioloyl)benzotrile ( <b>3CN-I2</b> ) .....          | 5  |
| 2.6  | 3-(3-iodopropioloyl)benzotrile ( <b>3CN</b> ).....                          | 5  |
| 2.7  | 4-(3-(trimethylsilyl)propioloyl)benzotrile ( <b>4CN-I2</b> ) .....          | 5  |
| 2.8  | 4-(3-iodopropioloyl)benzotrile ( <b>4CN</b> ).....                          | 5  |
| 2.9  | 1-(3-nitrophenyl)-3-(trimethylsilyl)prop-2-yn-1-one ( <b>3N-I2</b> ) .....  | 5  |
| 2.10 | 3-iodo-1-(3-nitrophenyl)prop-2-yn-1-one ( <b>3N</b> ) .....                 | 6  |
| 2.11 | 1-(4-nitrophenyl)-3-(trimethylsilyl)prop-2-yn-1-one ( <b>4N-I2</b> ).....   | 6  |
| 2.12 | 3-iodo-1-(4-nitrophenyl)prop-2-yn-1-one ( <b>4N</b> ) .....                 | 6  |
| 3    | Spectral data .....                                                         | 7  |
| 3.1  | 1-phenyl-3-(trimethylsilyl)prop-2-yn-1-one ( <b>US-I2</b> ).....            | 7  |
| 3.2  | 3-iodo-1-phenylprop-2-yn-1-one ( <b>US</b> ) .....                          | 8  |
| 3.3  | 1-(4-fluorophenyl)-3-(trimethylsilyl)prop-2-yn-1-one ( <b>4F-I2</b> ) ..... | 9  |
| 3.4  | 1-(4-fluorophenyl)-3-iodoprop-2-yn-1-one ( <b>4F</b> ).....                 | 10 |
| 3.5  | 3-(3-(trimethylsilyl)propioloyl)benzotrile ( <b>3CN-I2</b> ) .....          | 11 |
| 3.6  | 3-(3-iodopropioloyl)benzotrile ( <b>3CN</b> ).....                          | 12 |
| 3.7  | 4-(3-(trimethylsilyl)propioloyl)benzotrile ( <b>4CN-I2</b> ) .....          | 13 |
| 3.8  | 4-(3-iodopropioloyl)benzotrile ( <b>4CN</b> ).....                          | 14 |
| 3.9  | 1-(3-nitrophenyl)-3-(trimethylsilyl)prop-2-yn-1-one ( <b>3N-I2</b> ) .....  | 15 |
| 3.10 | 3-iodo-1-(3-nitrophenyl)prop-2-yn-1-one ( <b>3N</b> ) .....                 | 16 |
| 3.11 | 1-(4-nitrophenyl)-3-(trimethylsilyl)prop-2-yn-1-one ( <b>4N-I2</b> ).....   | 17 |
| 3.12 | 3-iodo-1-(4-nitrophenyl)prop-2-yn-1-one ( <b>4N</b> ) .....                 | 18 |
| 4    | Crystallographic information.....                                           | 18 |
| 5    | References:.....                                                            | 20 |

## 1 General Remarks

Commercial reagents were purchased as reagent-grade and used without further purification. All solvents utilized in this study were purchased commercially as technical grade and used as is without further purification. Targets were synthesized by modified versions of previously reported synthetic routes as described next. Melting points were measured using a TA Instruments DSC Q20 differential scanning calorimeter. Nuclear magnetic resonance (NMR) data were collected using either a Bruker Ascend 400 MHz spectrometer. The residual solvent peak was used as the internal reference for  $^1\text{H}$  and  $^{13}\text{C}$  NMR ( $\text{CDCl}_3$ :  $\delta\text{H}=7.26\text{ppm}$ ,  $\delta\text{C}=77.16\text{ppm}$ ). For the  $^{19}\text{F}$  NMR spectra, the fluorine peak was referenced against the residual solvent peak in its corresponding  $^1\text{H}$  spectrum ( $\delta\text{H}=7.26\text{ppm}$ ). Target signals have been picked and labeled in all spectra, and have been integrated in  $^1\text{H}$  spectra. IR stretches were obtained using a Nicolet 380 FT-IR spectrometer using an attenuated total reflection (ATR) technique and ZnSe as the crystal. Single crystal X-ray diffraction data were collected either using a Rigaku XtaLAB Synergy-S<sup>1</sup> (4CN, 3N, 4N) or Bruker Kappa APEX-II CCD<sup>2</sup> (US, 4F, 3CN) diffractometer. The structure was solved using Olex2<sup>3</sup> with the SHELXT<sup>4</sup> structure solution program using Intrinsic Phasing and refined with the SHELXL<sup>5</sup> refinement package using Least Squares minimization. Computational calculations were carried out using Spartan '14 software package. The  $\sigma$ -hole potentials were determined from the optimized geometries at B3LYP/6-311++G\*\* level of theory with iso=0.002 e/au. To determine the interactions energies, the target-ammonia dimer geometries were first optimized at MP2/6-311++G\*\* level of theory, following which a single-point energy calculation was carried out at the same level of theory to determine the counterpoise corrected interaction energies ( $\Delta E$ ) defined as  $\Delta E = E(\text{dimer complex}) - [E(\text{target}) + E(\text{ammonia})]$ .

## 2 Synthetic procedures

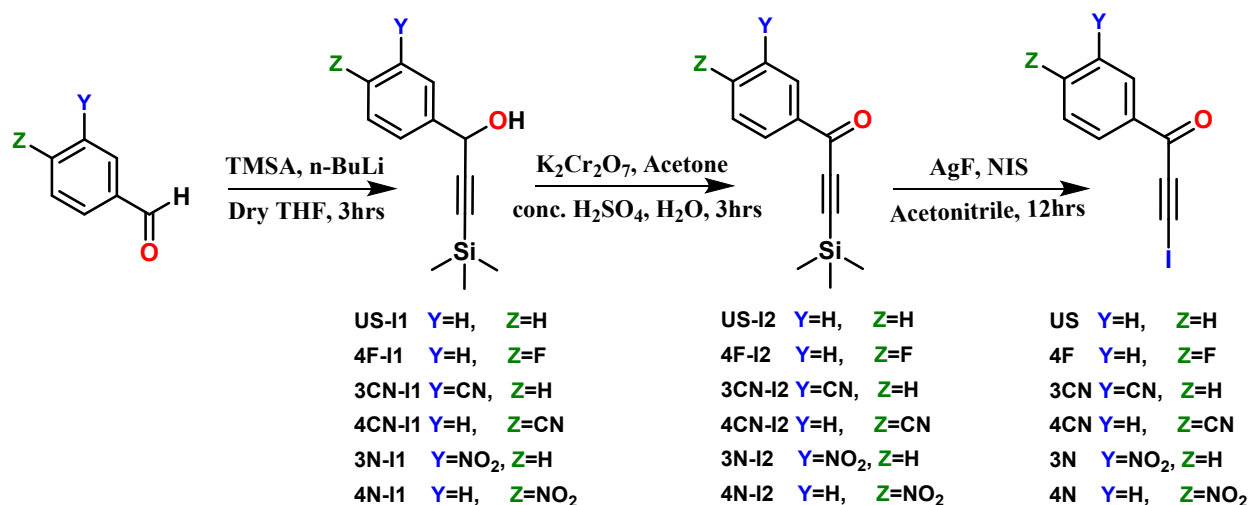

Scheme 1: Schematic showing the pathway used to synthesize the targets explored in this study

### General synthetic procedure

Targets were synthesized using modified versions of previously reported synthetic procedures.<sup>6-8</sup>

Anhydrous THF (120ml) was added to an evacuated round bottom (RB) flask and cooled to  $-78^{\circ}\text{C}$  in a dry ice/acetone bath under  $\text{N}_2$  flow, to which trimethylsilylacetylene (TMSA, 1.5 Eq, 15mmol, 2.25ml) was added followed by slow dropwise addition of n-BuLi (1.5 Eq, 15mmol, 6ml of 2.5M in Hexanes). The mixture was stirred for 15 minutes, following which the corresponding aldehyde (10mmol) was slowly added dropwise, after which the mixture was continued stirring at  $-78^{\circ}\text{C}$  for 3 hours to form the first intermediate, correspondingly substituted 1-phenyl-3-(trimethylsilyl)prop-2-yn-1-ols (**-I1**).

Since this intermediate was unstable, the subsequent Jones oxidation was carried out in-situ without isolating first intermediate. To the previous mixture still in cooling bath, acetone (60ml) was first added followed by  $\text{K}_2\text{Cr}_2\text{O}_7$  (1.8 Eq, 12mmol, 3.530g), conc.  $\text{H}_2\text{SO}_4$  (2ml) and water (60ml). After complete addition, RB is removed from the cooling bath and stirred at RT under  $\text{N}_2$  flow for 3 hours to form the product. The crude mixture was first evaporated under reduced pressure to remove organic solvents, and the resulting aqueous mixture was extracted with chloroform (6X25ml), combined organic fractions dried with  $\text{MgSO}_4$  and evaporated, and resulting residue was purified by column chromatography (Using hexanes, eluted with 5% EtOAc in Hexanes) to give purified second intermediate, correspondingly substituted 1-phenyl-3-(trimethylsilyl)prop-2-yn-1-ones (**-I2**) in 73-82% yield.

Intermediate **-I2** from the previous reaction was dissolved in acetonitrile (50ml) in a RB covered in aluminum foil, to which silver(I)fluoride (AgF, 10mmol, 1.2687g) and N-iodosuccinimide (NIS, 10mmol, 2.250g) was added and the mixture stirred under  $\text{N}_2$  flow for 12 hours to form the product. The crude mixture was evaporated under reduced pressure and the residue purified by column chromatography (Using dichloromethane, eluted with 100% dichloromethane). The appropriate fraction was collected and washed with water (4X25ml), aqueous sodium thiosulfate (1X25ml), brine (1X25ml) and dried with  $\text{MgSO}_4$  and evaporated to yield purified final targets, correspondingly substituted 3-iodo-1-phenylprop-2-yn-1-ones in 60-84% yield.

### 2.1 1-phenyl-3-(trimethylsilyl)prop-2-yn-1-one (US-I2)

Yield: 77.7%. Bp: 128-130 $^{\circ}\text{C}$ .  $^1\text{H}$  NMR (400 MHz, Chloroform-d)  $\delta$  8.14 (d,  $J = 7.4$  Hz, 2H), 7.68 – 7.54 (m, 1H), 7.48 (t,  $J = 7.0$  Hz, 2H), 0.32 (s, 9H).  $^{13}\text{C}$  NMR (101 MHz,  $\text{CDCl}_3$ )  $\delta$  177.80, 136.52, 134.29, 129.73, 128.67, 100.90, 100.69, -0.60. FTIR ( $\text{cm}^{-1}$ , ZnSe crystal): 2153 ( $\text{C}\equiv\text{C}$ ).

### 2.2 3-iodo-1-phenylprop-2-yn-1-one (US)

Yield: 71.9%. Mp: 143-145 $^{\circ}\text{C}$ .  $^1\text{H}$  NMR (400 MHz, Chloroform-d)  $\delta$  8.12 (d,  $J = 7.7$  Hz, 2H), 7.62 (t,  $J = 7.6$  Hz, 1H), 7.48 (t,  $J = 7.7$  Hz, 2H).  $^{13}\text{C}$  NMR (101 MHz,  $\text{CDCl}_3$ )  $\delta$  176.52, 136.15, 134.57, 129.90, 128.78, 94.01, 20.62. FTIR ( $\text{cm}^{-1}$ , ZnSe crystal): 2144 ( $\text{C}\equiv\text{C}$ )

### 2.3 1-(4-fluorophenyl)-3-(trimethylsilyl)prop-2-yn-1-one (4F-I2)

Yield: 73.1%. Bp: 143-145°C. <sup>1</sup>H NMR (400 MHz, Chloroform-d) δ 8.15 – 8.12 (m, 2H), 7.13 (dd, J = 9.5, 7.7 Hz, 2H), 0.29 (s, 9H). <sup>13</sup>C NMR (101 MHz, CDCl<sub>3</sub>) δ 176.06, 167.82, 165.27, 133.06, 132.43, 132.33, 115.99, 115.77, 100.95, 100.57, -0.66. <sup>19</sup>F NMR (376 MHz, CDCl<sub>3</sub>) δ -103.09. FTIR (cm<sup>-1</sup>, ZnSe crystal): 2153 (C≡C).

### 2.4 1-(4-fluorophenyl)-3-iodoprop-2-yn-1-one (4F)

Yield: 83.7%. Mp: 96-98°C. <sup>1</sup>H NMR (400 MHz, Chloroform-d) δ 8.14 (ddd, J = 7.9, 5.4, 2.1 Hz, 2H), 7.16 (td, J = 8.7, 2.0 Hz, 2H). <sup>13</sup>C NMR (101 MHz, CDCl<sub>3</sub>) δ 174.88, 168.03, 165.47, 132.67, 132.58, 116.21, 115.99, 93.75, 20.82. <sup>19</sup>F NMR (376 MHz, CDCl<sub>3</sub>) δ -102.30. FTIR (cm<sup>-1</sup>, ZnSe crystal): 2145 (C≡C).

### 2.5 3-(3-(trimethylsilyl)propioloyl)benzotrile (3CN-I2)

Yield: 80.0%. Mp: 47-49.0°C. <sup>1</sup>H NMR (400 MHz, CDCl<sub>3</sub>) δ 8.35 (s, 1H), 8.31 (d, J = 7.9 Hz, 1H), 7.86 (d, J = 7.7 Hz, 1H), 7.62 (t, J = 7.8 Hz, 1H), 0.30 (s, 9H). <sup>13</sup>C NMR (101 MHz, CDCl<sub>3</sub>) δ 175.26, 137.05, 136.89, 133.26, 133.15, 129.75, 117.73, 113.17, 103.02, 99.80, -0.79. FTIR (cm<sup>-1</sup>, ZnSe crystal): 2152 (C≡C), 2230 (C≡N).

### 2.6 3-(3-iodopropioloyl)benzotrile (3CN)

Yield: 72.5%. Mp: 126-128°C. <sup>1</sup>H NMR (400 MHz, Chloroform-d) δ 8.36 (s, 1H), 8.31 (d, J = 8.0 Hz, 1H), 7.88 (d, J = 8.1 Hz, 1H), 7.64 (t, J = 7.8 Hz, 1H). <sup>13</sup>C NMR (101 MHz, CDCl<sub>3</sub>) δ 174.12, 137.14, 136.80, 133.42, 133.38, 129.88, 117.66, 113.27, 93.15, 24.16. FTIR (cm<sup>-1</sup>, ZnSe crystal): 2146 (C≡C), 2239 (C≡N).

### 2.7 4-(3-(trimethylsilyl)propioloyl)benzotrile (4CN-I2)

Yield: 80.1%. Mp: 75-77°C. <sup>1</sup>H NMR (400 MHz, Chloroform-d) δ 8.18 (d, J = 7.4 Hz, 2H), 7.76 (d, J = 7.7 Hz, 2H), 0.29 (s, 9H). <sup>13</sup>C NMR (101 MHz, CDCl<sub>3</sub>) δ 175.82, 139.09, 132.45, 129.84, 117.80, 117.18, 103.04, 100.02, -0.82. FTIR (cm<sup>-1</sup>, ZnSe crystal): 2154 (C≡C), 2229 (C≡N).

### 2.8 4-(3-iodopropioloyl)benzotrile (4CN)

Yield: 66.9%. Decomp: 176-178°C. <sup>1</sup>H NMR (400 MHz, Chloroform-d) δ 8.21 (d, J = 8.0 Hz, 1H), 7.79 (d, J = 8.1 Hz, 1H). <sup>13</sup>C NMR (101 MHz, CDCl<sub>3</sub>) δ 174.73, 138.93, 132.62, 130.11, 117.82, 117.53, 93.49, 23.71. FTIR (cm<sup>-1</sup>, ZnSe crystal): 2147 (C≡C), 2231 (C≡N).

### 2.9 1-(3-nitrophenyl)-3-(trimethylsilyl)prop-2-yn-1-one (3N-I2)

Yield: 81.5%. Mp: 55-57°C. <sup>1</sup>H NMR (400 MHz, Chloroform-d) δ 8.94 (s, 1H), 8.44 (t, J = 7.3 Hz, 1H), 7.71 (t, J = 8.0 Hz, 1H), 0.34 (s, 9H). <sup>13</sup>C NMR (101 MHz, CDCl<sub>3</sub>) δ 175.22, 148.49,

137.74, 134.79, 130.03, 128.33, 124.65, 103.59, 99.93, -0.71. FTIR ( $\text{cm}^{-1}$ , ZnSe crystal): 2148 ( $\text{C}\equiv\text{C}$ ), 1531 ( $-\text{NO}_2$ ).

#### 2.10 3-iodo-1-(3-nitrophenyl)prop-2-yn-1-one (3N)

Yield: 60.0%. Mp: 106-108°C.  $^1\text{H}$  NMR (400 MHz, Chloroform- $d$ )  $\delta$  8.88 (s, 1H), 8.44 (dd,  $J$  = 12.3, 8.0 Hz, 2H), 7.72 (t,  $J$  = 8.0 Hz, 1H).  $^{13}\text{C}$  NMR (101 MHz,  $\text{CDCl}_3$ )  $\delta$  173.99, 148.50, 137.39, 135.08, 130.17, 128.58, 124.53, 93.31, 23.99. FTIR ( $\text{cm}^{-1}$ , ZnSe crystal): 2142 ( $\text{C}\equiv\text{C}$ ), 1527 ( $-\text{NO}_2$ ).

#### 2.11 1-(4-nitrophenyl)-3-(trimethylsilyl)prop-2-yn-1-one (4N-I2)

Yield: 73.6%. Mp: 96-98°C.  $^1\text{H}$  NMR (400 MHz, Chloroform- $d$ )  $\delta$  8.30 (q,  $J$  = 8.9 Hz, 4H), 0.33 (s, 7H).  $^{13}\text{C}$  NMR (101 MHz,  $\text{CDCl}_3$ )  $\delta$  175.68, 150.99, 140.60, 130.62, 123.91, 103.60, 100.19, 83.02, -0.70. FTIR ( $\text{cm}^{-1}$ , ZnSe crystal): 2154 ( $\text{C}\equiv\text{C}$ ), 1523 ( $-\text{NO}_2$ ).

#### 2.12 3-iodo-1-(4-nitrophenyl)prop-2-yn-1-one (4N)

Yield: 63.6%. Decomp: 189-191°C.  $^1\text{H}$  NMR (400 MHz, Chloroform- $d$ )  $\delta$  8.37 – 8.25 (m, 4H).  $^{13}\text{C}$  NMR (101 MHz,  $\text{CDCl}_3$ )  $\delta$  174.46, 151.16, 140.34, 130.82, 124.04, 93.65, 23.78. FTIR ( $\text{cm}^{-1}$ , ZnSe crystal): 2146 ( $\text{C}\equiv\text{C}$ ), 1506 ( $-\text{NO}_2$ ).

### 3 Spectral data

#### 3.1 1-phenyl-3-(trimethylsilyl)prop-2-yn-1-one (US-I2)

$^1\text{H}$  NMR (400 MHz, Chloroform-*d*)  $\delta$  8.14 (d,  $J = 7.4$  Hz, 1H), 7.68 – 7.54 (m, 1H), 7.48 (t,  $J = 7.0$  Hz, 1H), 0.32 (s, 3H).

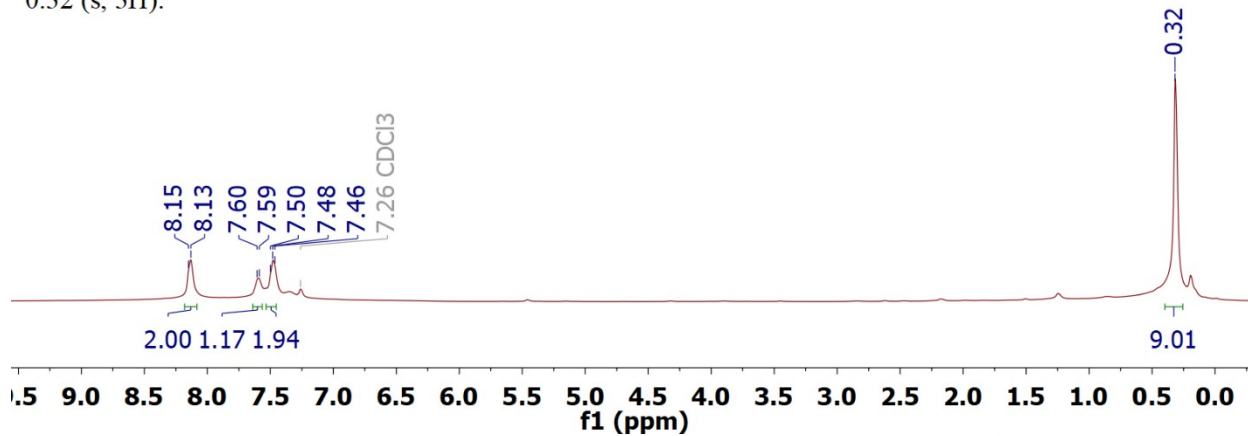

$^{13}\text{C}$  NMR (101 MHz, CDCl<sub>3</sub>)  $\delta$  177.80, 136.52, 134.29, 129.73, 128.67, 100.90, 100.69, -0.60.

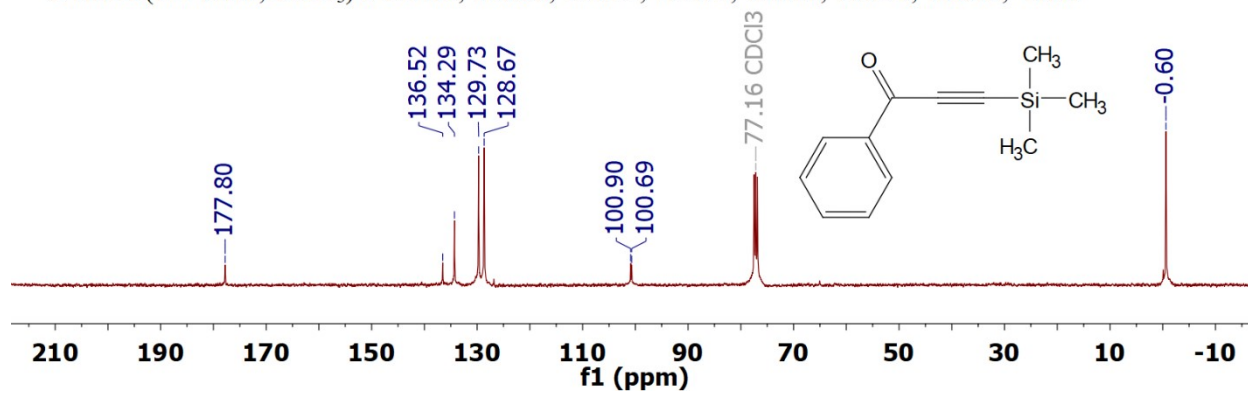

### 3.2 3-iodo-1-phenylprop-2-yn-1-one (US)

$^1\text{H}$  NMR (400 MHz, Chloroform-*d*)  $\delta$  8.12 (d,  $J = 7.7$  Hz, 2H), 7.62 (t,  $J = 7.6$  Hz, 1H), 7.48 (t,  $J = 7.7$  Hz, 2H).

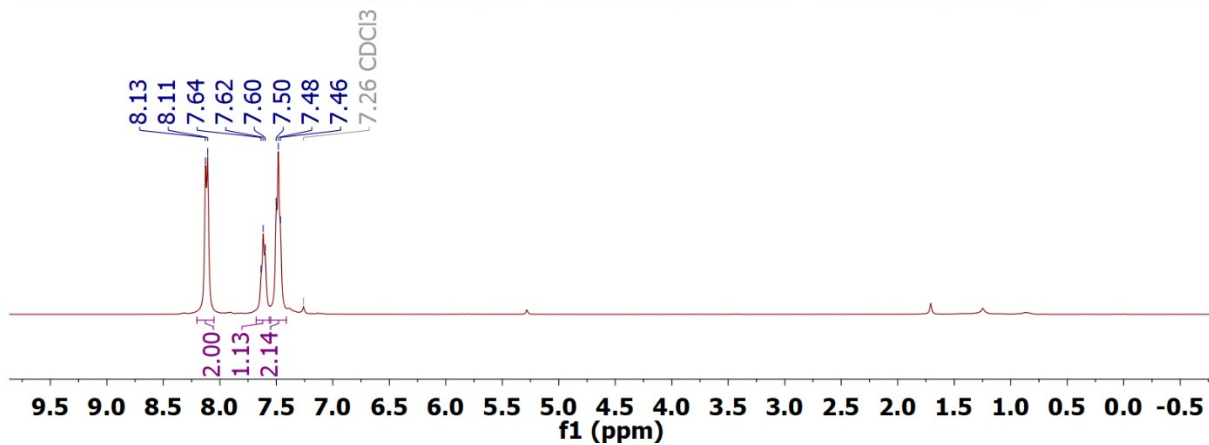

$^{13}\text{C}$  NMR (101 MHz, CDCl<sub>3</sub>)  $\delta$  176.52, 136.15, 134.57, 129.90, 128.78, 94.01, 20.62.

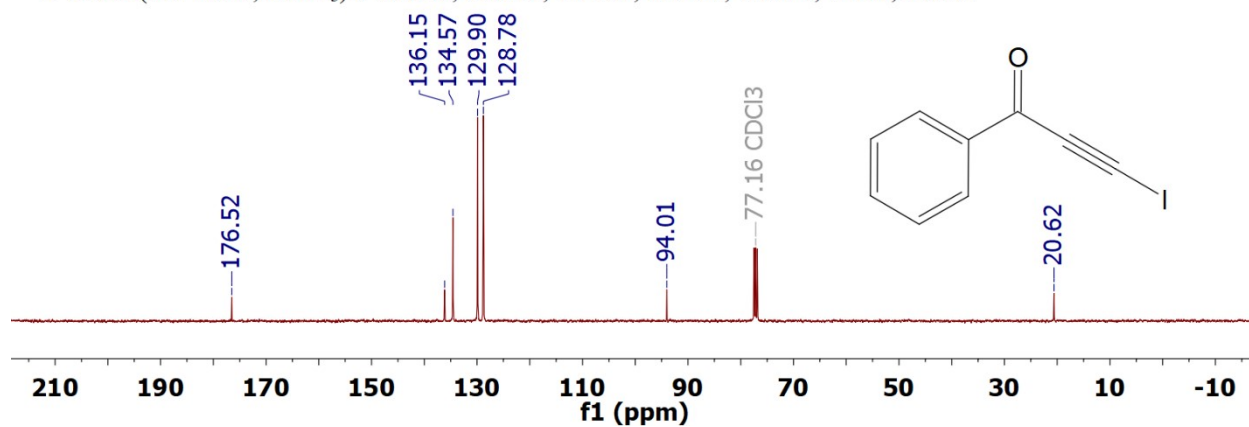



### 3.3 1-(4-fluorophenyl)-3-(trimethylsilyl)prop-2-yn-1-one (4F-I2)

$^1\text{H}$  NMR (400 MHz, Chloroform-*d*)  $\delta$  8.15 – 8.12 (m, 2H), 7.13 (dd,  $J = 9.5, 7.7$  Hz, 2H), 0.29 (s, 9H).

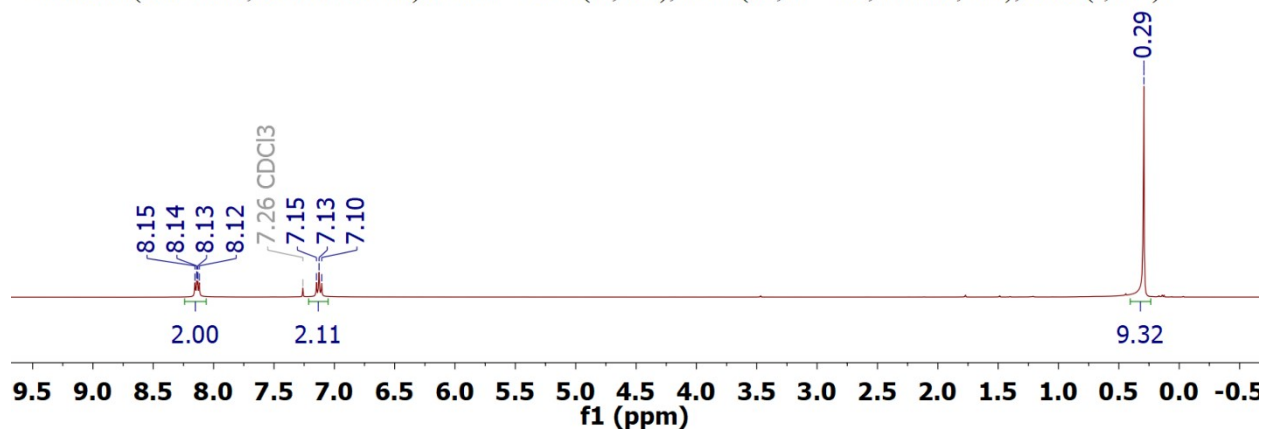

$^{19}\text{F}$  NMR (376 MHz, CDCl<sub>3</sub>)  $\delta$  -103.09.

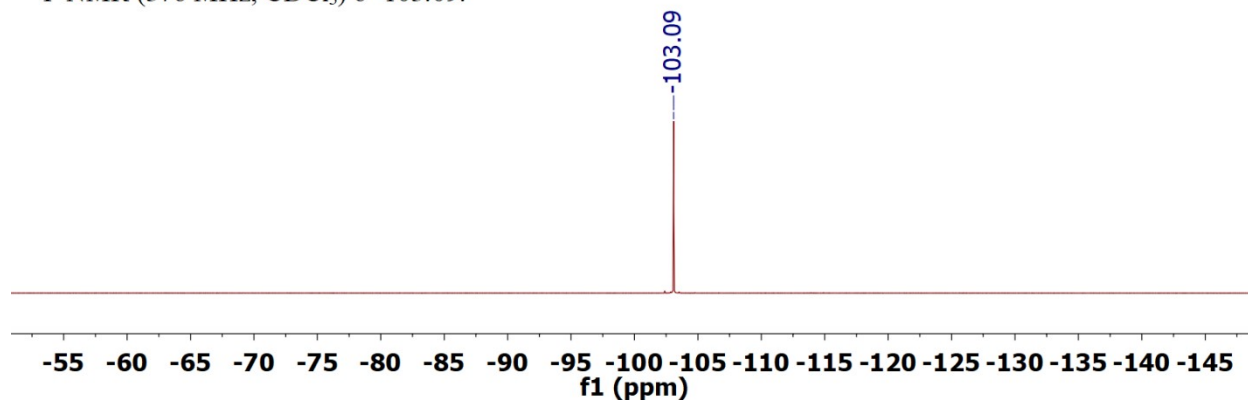

$^{13}\text{C}$  NMR (101 MHz, CDCl<sub>3</sub>)  $\delta$  176.06, 167.82, 165.27, 133.06, 132.43, 132.33, 115.99, 115.77, 100.95, 100.57, -0.66.

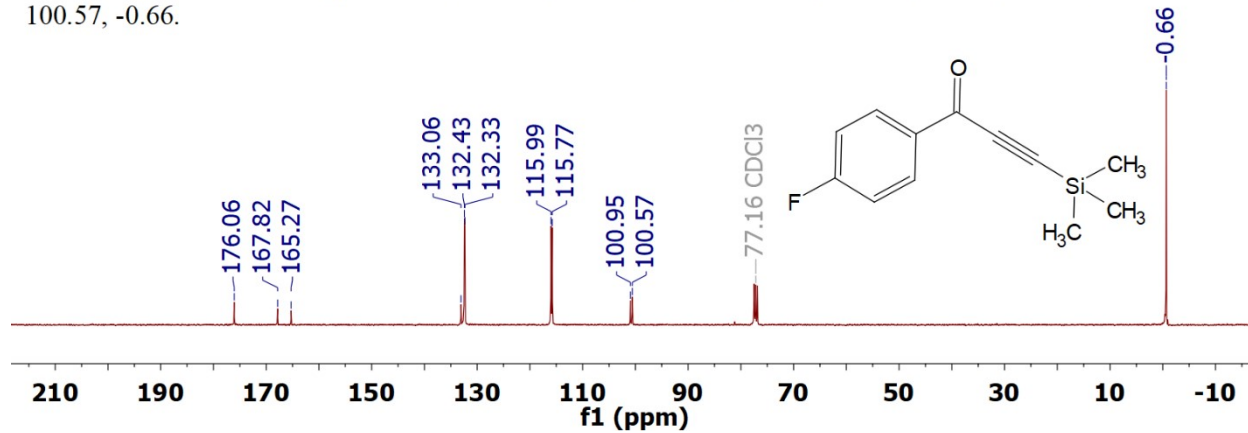

### 3.4 1-(4-fluorophenyl)-3-iodoprop-2-yn-1-one (4F)

$^1\text{H}$  NMR (400 MHz, Chloroform-*d*)  $\delta$  8.14 (ddd,  $J = 7.9, 5.4, 2.1$  Hz, 2H), 7.16 (td,  $J = 8.7, 2.0$  Hz, 2H).

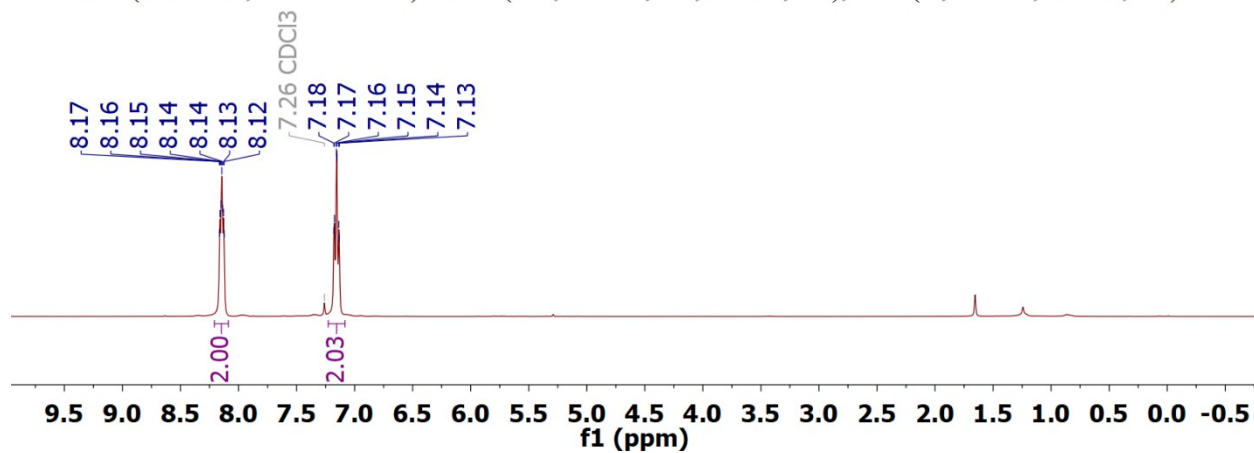

$^{19}\text{F}$  NMR (376 MHz,  $\text{CDCl}_3$ )  $\delta$  -102.30.

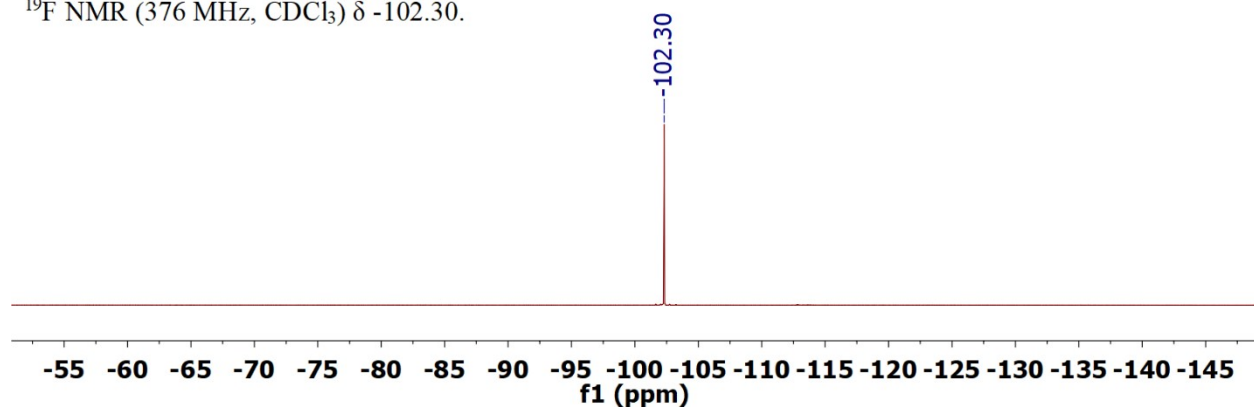

$^{13}\text{C}$  NMR (101 MHz,  $\text{CDCl}_3$ )  $\delta$  174.88, 168.03, 165.47, 132.67, 132.58, 116.21, 115.99, 93.75, 77.16 (CDCl<sub>3</sub>), 20.82.

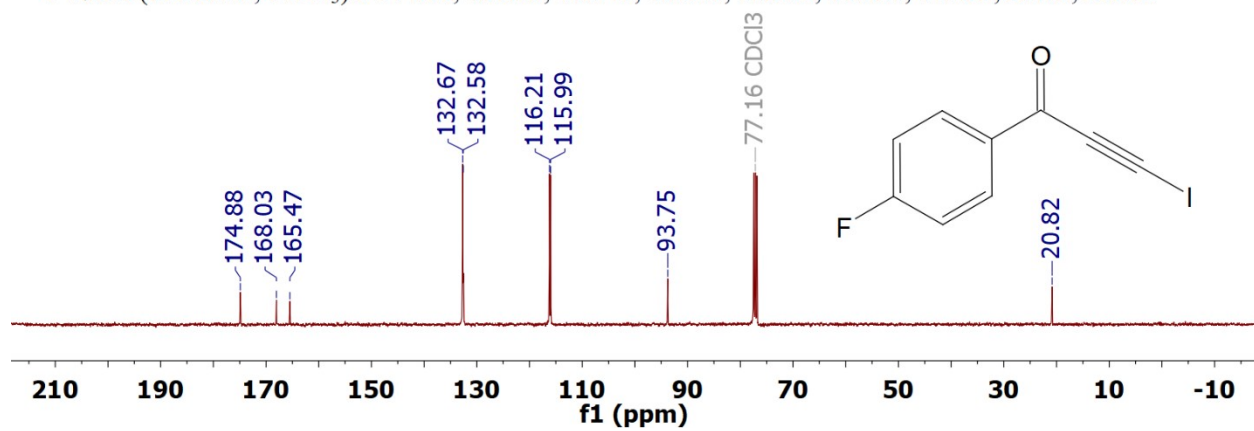

### 3.5 3-(3-(trimethylsilyl)propioloyl)benzonitrile (3CN-12)

$^1\text{H}$  NMR (400 MHz,  $\text{CDCl}_3$ )  $\delta$  8.35 (s, 1H), 8.31 (d,  $J = 7.9$  Hz, 1H), 7.86 (d,  $J = 7.7$  Hz, 1H), 7.62 (t,  $J = 7.8$  Hz, 1H), 0.30 (s, 9H).

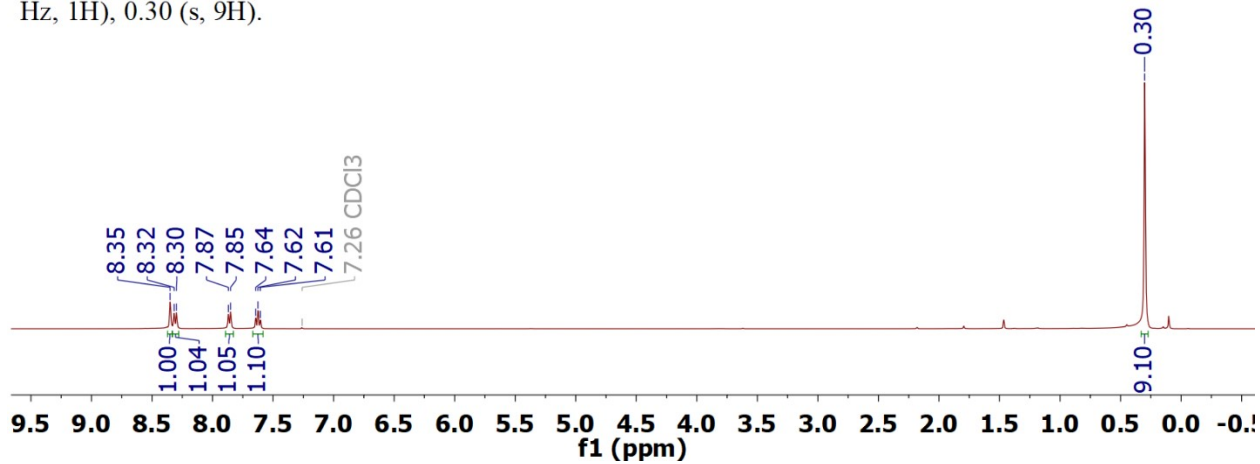

$^{13}\text{C}$  NMR (101 MHz,  $\text{CDCl}_3$ )  $\delta$  ppm 175.26, 137.05, 136.89, 133.26, 133.15, 129.75, 117.73, 113.17, 103.02, 99.80, -0.79.

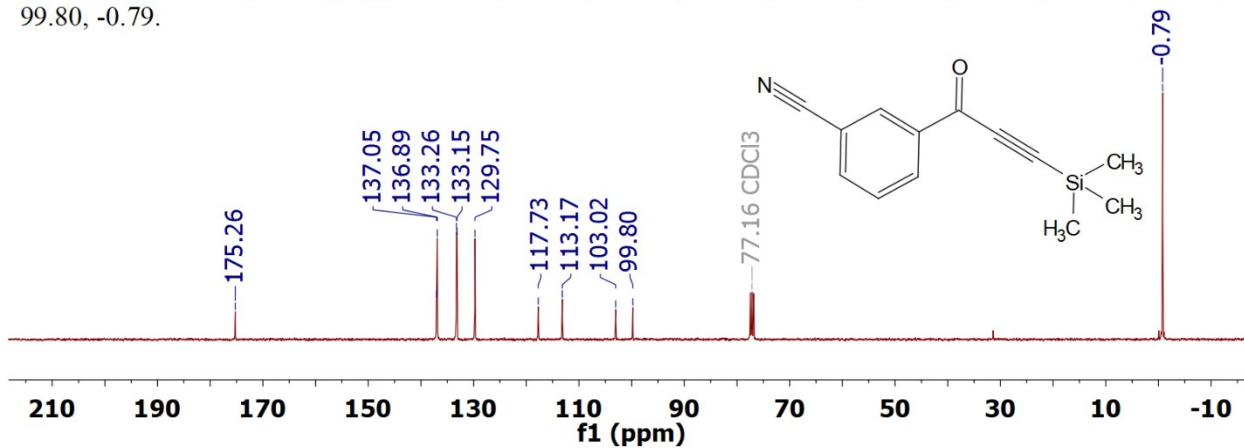

### 3.6 3-(3-iodopropioloxy)benzonitrile (3CN)

$^1\text{H}$  NMR (400 MHz, Chloroform-*d*)  $\delta$  8.36 (s, 1H), 8.31 (d,  $J = 8.0$  Hz, 1H), 7.88 (d,  $J = 8.1$  Hz, 1H), 7.64 (t,  $J = 7.8$  Hz, 1H).

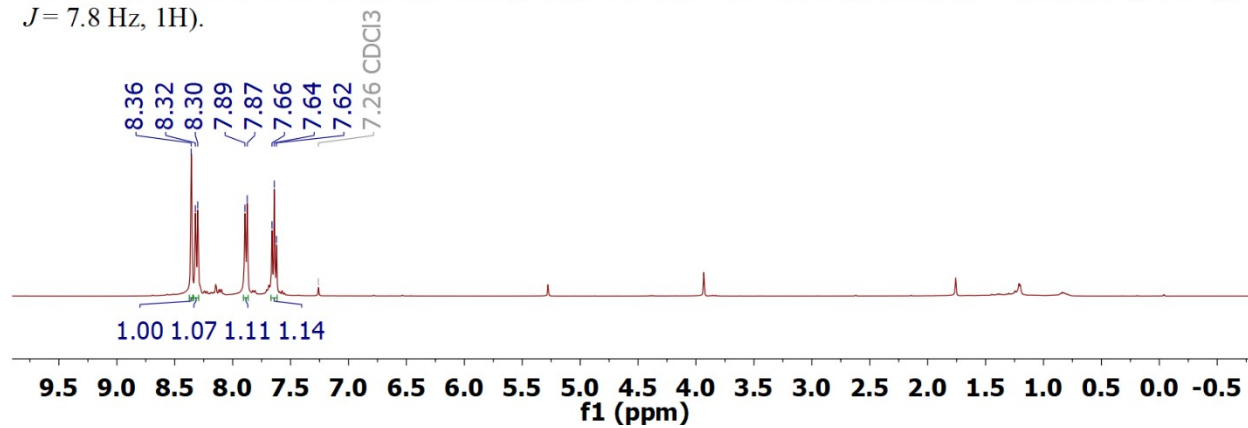

$^{13}\text{C}$  NMR (101 MHz, CDCl<sub>3</sub>)  $\delta$  174.12, 137.14, 136.80, 133.42, 133.38, 129.88, 117.66, 113.27, 93.15, 77.16, 24.16.

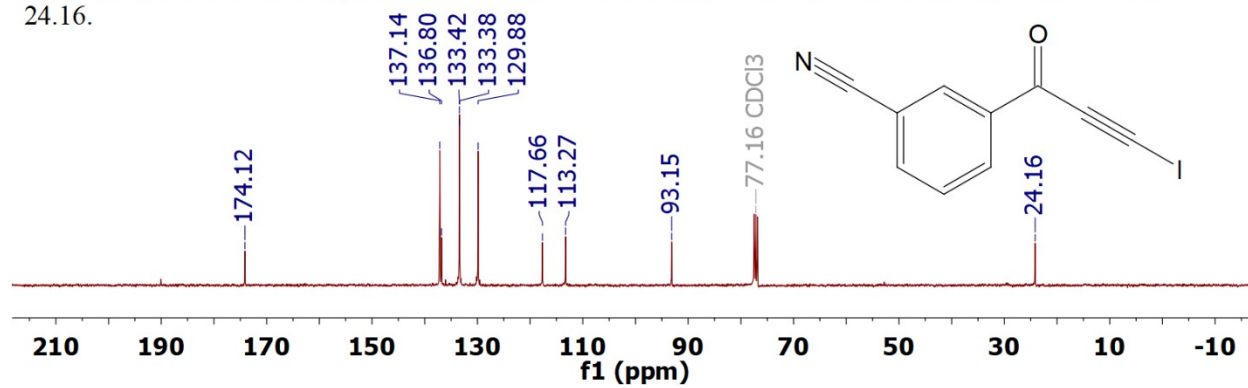

### 3.7 4-(3-(trimethylsilyl)propioloyl)benzonitrile (4CN-I2)

$^1\text{H}$  NMR (400 MHz, Chloroform-*d*)  $\delta$  8.18 (d,  $J = 7.4$  Hz, 2H), 7.76 (d,  $J = 7.7$  Hz, 2H), 0.29 (s, 8H).

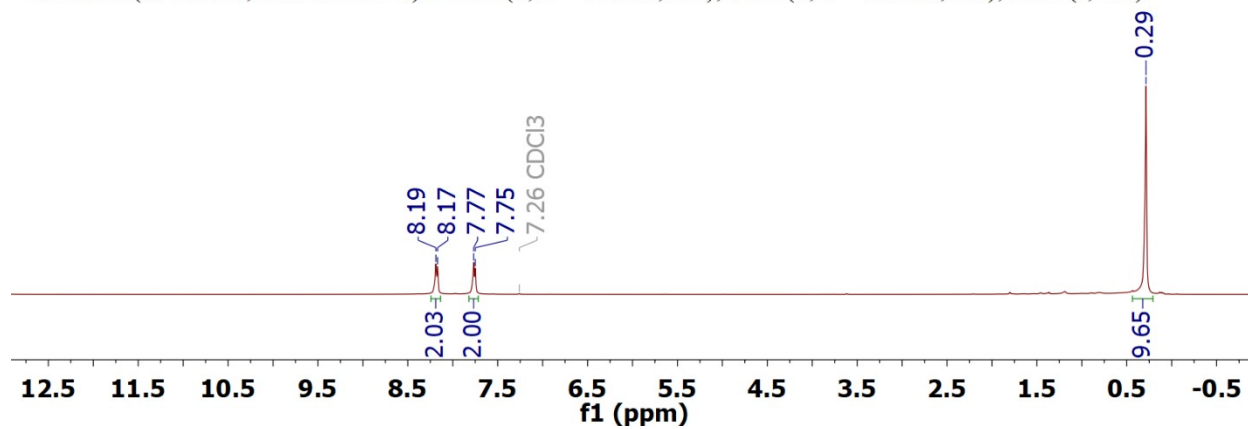

$^{13}\text{C}$  NMR (101 MHz, CDCl<sub>3</sub>)  $\delta$  175.82, 139.09, 132.45, 129.84, 117.80, 117.18, 103.04, 100.02, -0.82.

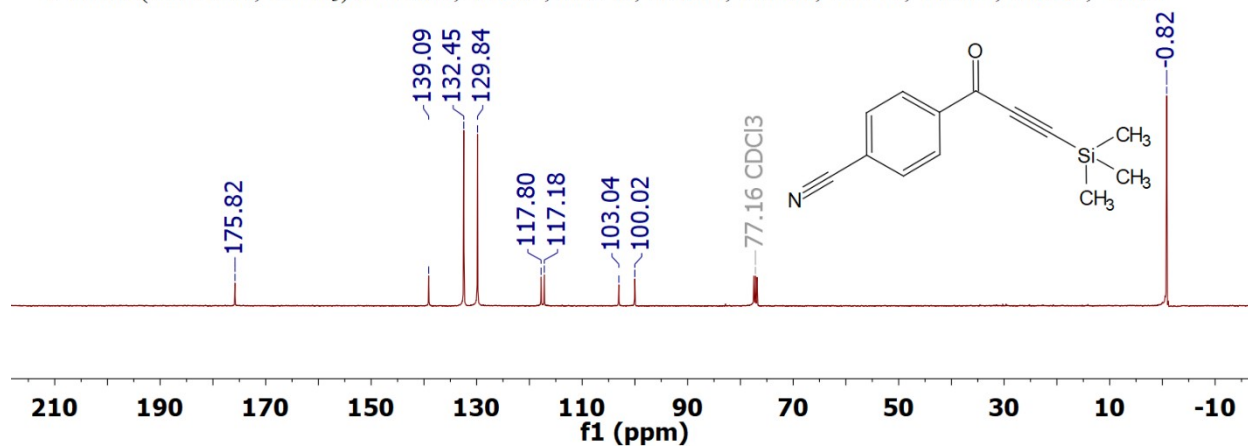

### 3.8 4-(3-iodopropioloyle)benzonitrile (4CN)

$^1\text{H}$  NMR (400 MHz, Chloroform-*d*)  $\delta$  8.21 (d,  $J = 8.0$  Hz, 1H), 7.79 (d,  $J = 8.1$  Hz, 1H).

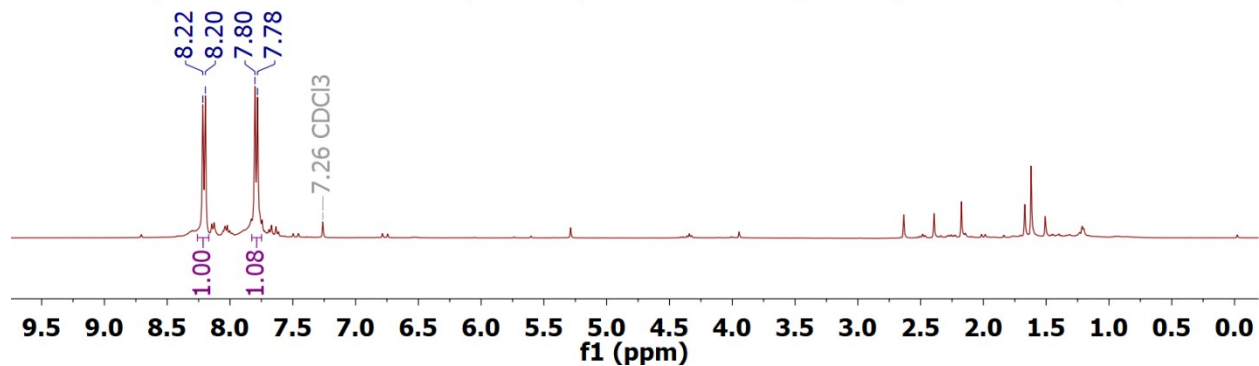

$^{13}\text{C}$  NMR (101 MHz, CDCl<sub>3</sub>)  $\delta$  174.73, 138.93, 132.62, 130.11, 117.82, 117.53, 93.49, 77.16, 23.71.

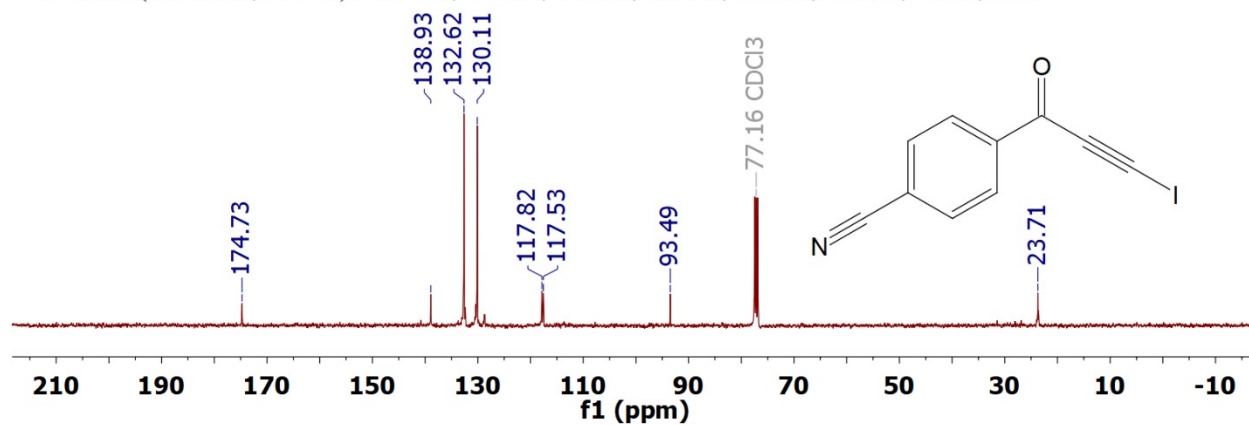

### 3.9 1-(3-nitrophenyl)-3-(trimethylsilyl)prop-2-yn-1-one (3N-I2)

$^1\text{H}$  NMR (400 MHz, Chloroform-*d*)  $\delta$  8.94 (s, 1H), 8.44 (t,  $J = 7.3$  Hz, 1H), 7.71 (t,  $J = 8.0$  Hz, 1H), 0.34 (s, 9H).

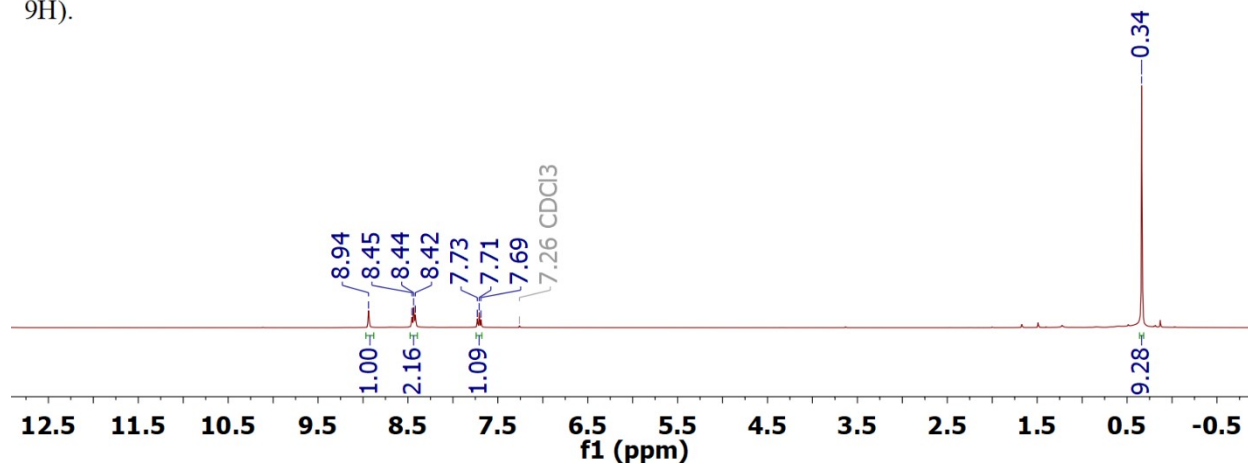

$^{13}\text{C}$  NMR (101 MHz,  $\text{CDCl}_3$ )  $\delta$  175.22, 148.49, 137.74, 134.79, 130.03, 128.33, 124.65, 103.59, 99.93, -0.71.

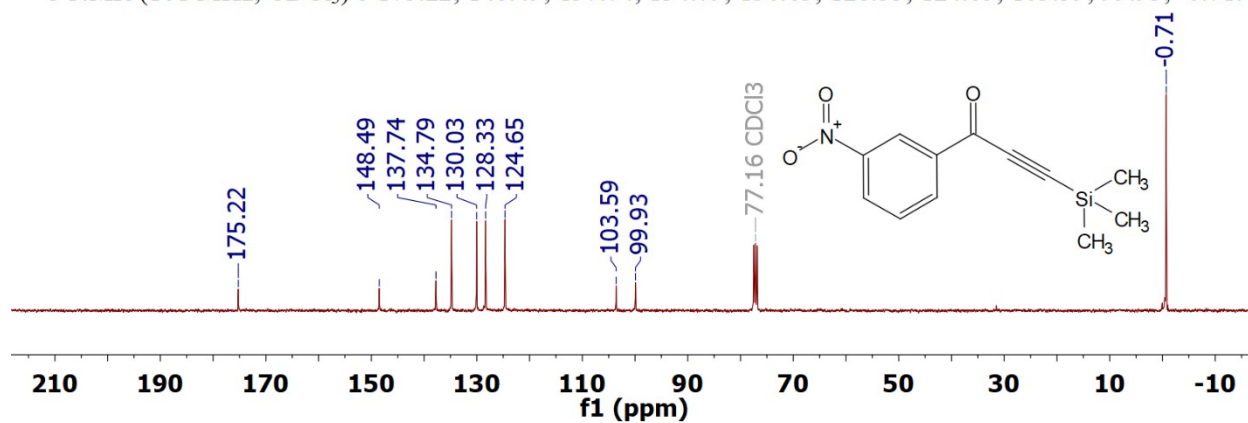

### 3.10 3-iodo-1-(3-nitrophenyl)prop-2-yn-1-one (**3N**)

$^1\text{H NMR}$  (400 MHz, Chloroform-*d*)  $\delta$  8.88 (s, 1H), 8.44 (dd,  $J = 12.3, 8.0$  Hz, 2H), 7.72 (t,  $J = 8.0$  Hz, 1H).

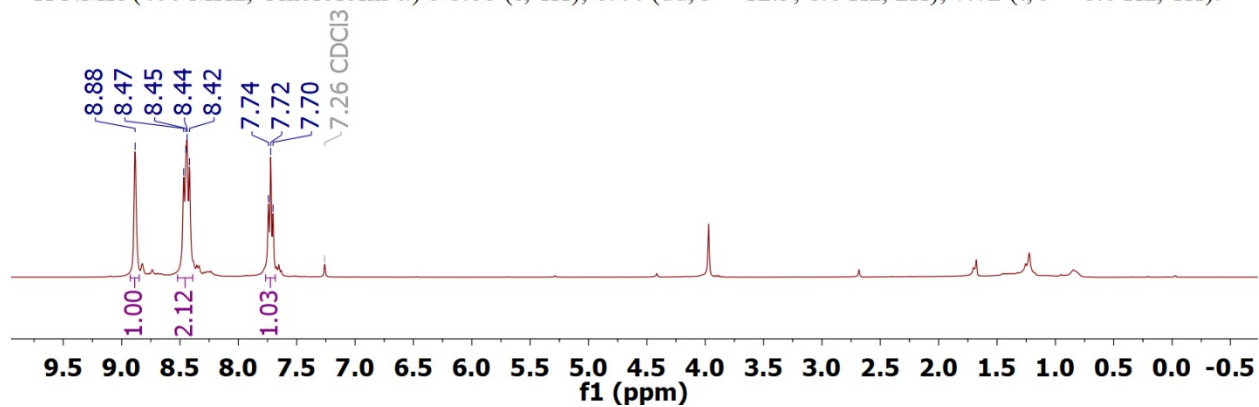

$^{13}\text{C NMR}$  (101 MHz,  $\text{CDCl}_3$ )  $\delta$  173.99, 148.50, 137.39, 135.08, 130.17, 128.58, 124.53, 93.31, 77.16, 23.99.

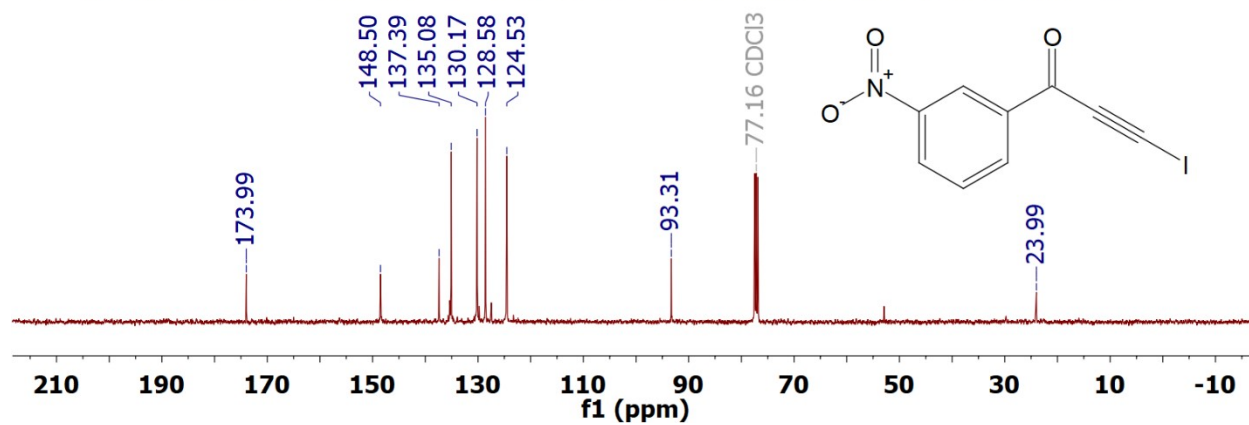



### 3.11 1-(4-nitrophenyl)-3-(trimethylsilyl)prop-2-yn-1-one (4N-I2)

$^1\text{H}$  NMR (400 MHz, Chloroform-*d*)  $\delta$  8.30 (q,  $J = 8.9$  Hz, 4H), 0.33 (s, 7H).

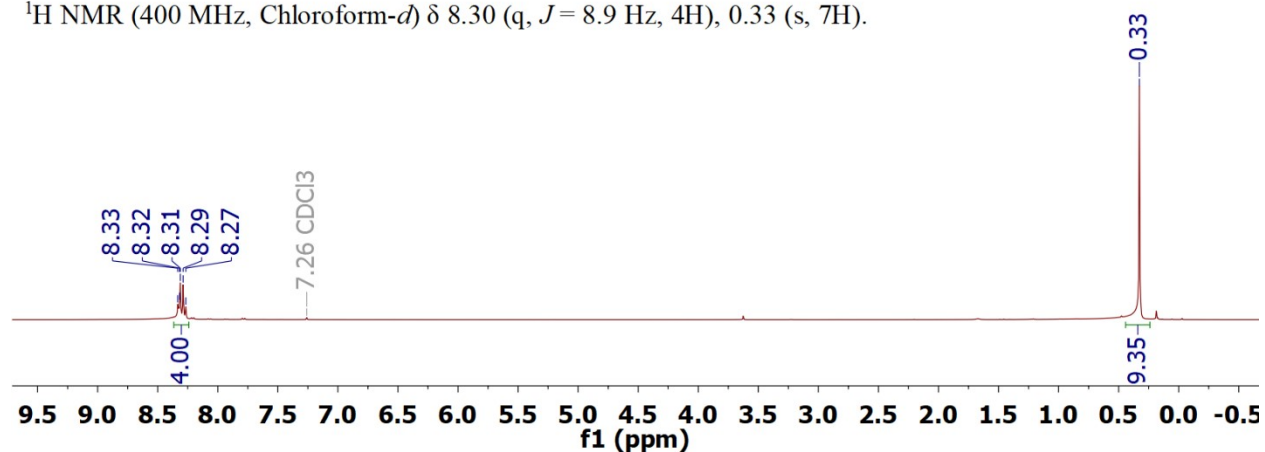

$^{13}\text{C}$  NMR (101 MHz,  $\text{CDCl}_3$ )  $\delta$  175.68, 150.99, 140.60, 130.62, 123.91, 103.60, 100.19, 83.02, -0.70.

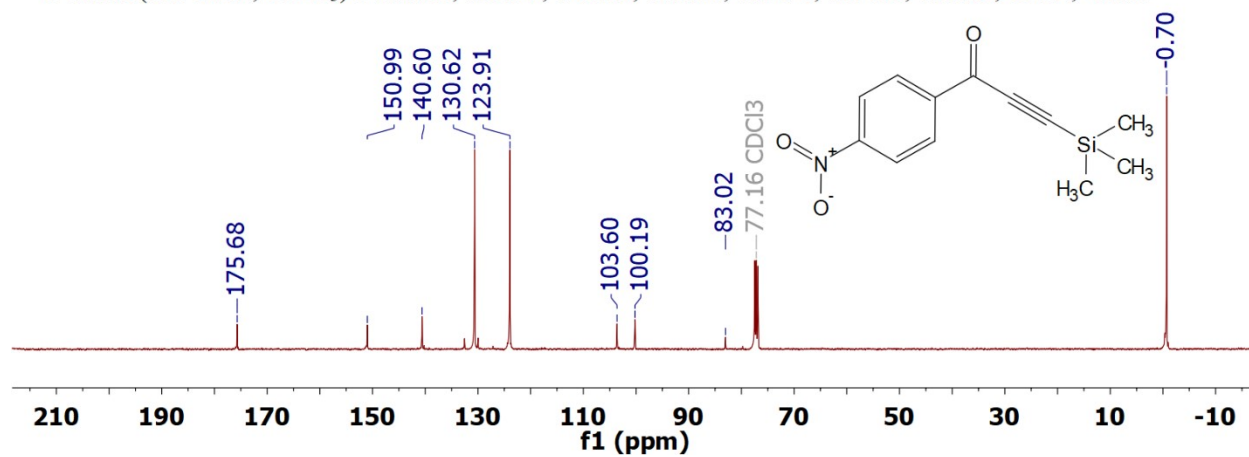

### 3.12 3-iodo-1-(4-nitrophenyl)prop-2-yn-1-one (4N)

$^1\text{H}$  NMR (400 MHz, Chloroform-*d*)  $\delta$  8.37 – 8.25 (m, 4H).

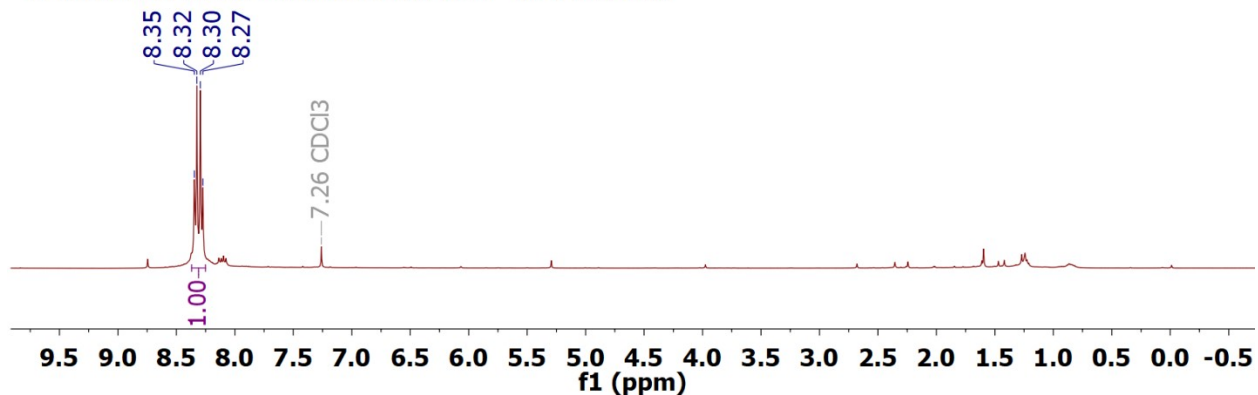

$^{13}\text{C}$  NMR (101 MHz,  $\text{CDCl}_3$ )  $\delta$  174.46, 151.16, 140.34, 130.82, 124.04, 93.65, 77.16, 23.78.

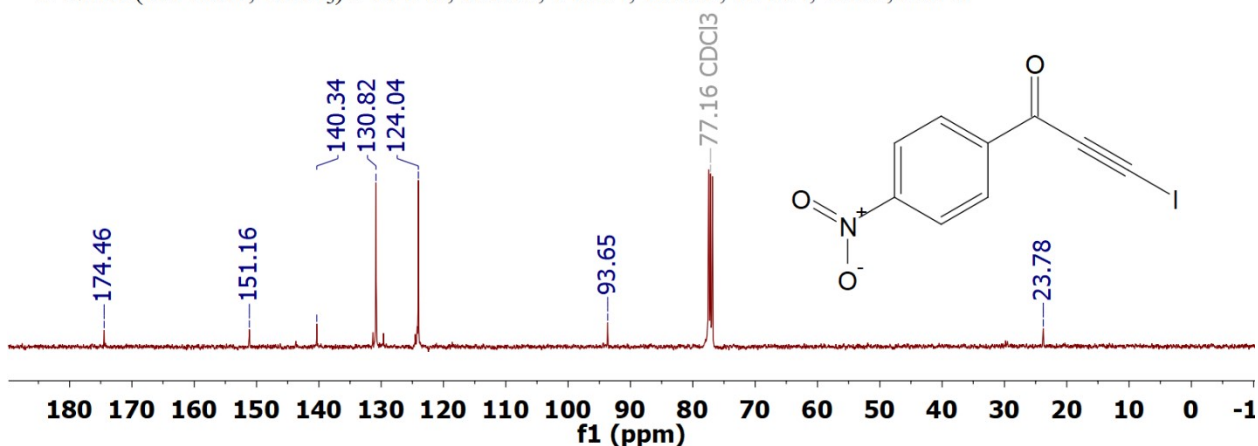

## 4 Crystallographic information

**Table S1.** Crystallographic information of targets explored in this study

| Target code       | US                              | 4F                                       | 3CN                                     | 4CN                                     | 3N                                      | 4N                                      |
|-------------------|---------------------------------|------------------------------------------|-----------------------------------------|-----------------------------------------|-----------------------------------------|-----------------------------------------|
| CCDC Number       | 2110111                         | 2110113                                  | 2110114                                 | 2110094                                 | 2110098                                 | 2110093                                 |
| Systematic name   | 3-iodo-1-phenylprop-2-yn-1-one  | 1-(4-fluorophenyl)-3-iodoprop-2-yn-1-one | 1-(3-cyanophenyl)-3-iodoprop-2-yn-1-one | 1-(4-cyanophenyl)-3-iodoprop-2-yn-1-one | 1-(3-nitrophenyl)-3-iodoprop-2-yn-1-one | 1-(4-nitrophenyl)-3-iodoprop-2-yn-1-one |
| Formula moiety    | $\text{C}_9\text{H}_5\text{IO}$ | $\text{C}_9\text{H}_4\text{FIO}$         | $\text{C}_{10}\text{H}_4\text{INO}$     | $\text{C}_{10}\text{H}_4\text{INO}$     | $\text{C}_9\text{H}_4\text{INO}_3$      | $\text{C}_9\text{H}_4\text{INO}_3$      |
| Empirical formula | $\text{C}_9\text{H}_5\text{IO}$ | $\text{C}_9\text{H}_4\text{FIO}$         | $\text{C}_{10}\text{H}_4\text{INO}$     | $\text{C}_{10}\text{H}_4\text{INO}$     | $\text{C}_9\text{H}_4\text{INO}_3$      | $\text{C}_9\text{H}_4\text{INO}_3$      |
| Molecular weight  | 256.04                          | 274.03                                   | 281.04                                  | 281.04                                  | 301.04                                  | 301.04                                  |

|                                                 |                       |                  |                       |                       |                             |                              |
|-------------------------------------------------|-----------------------|------------------|-----------------------|-----------------------|-----------------------------|------------------------------|
| Solvent used for crystallization                | Dioxane               | Dioxane          | Dioxane               | Dioxane               | THF                         | Dioxane                      |
| Color, Habit                                    | Colorless, Chunk      | Colorless, Block | Colorless, Thin plate | Colorless, Plate      | Clear pale colorless, Block | Clear light colorless, Plate |
| Crystal system                                  | Monoclinic            | Tetragonal       | Tetragonal            | Monoclinic            | Triclinic                   | Monoclinic                   |
| Space group, <i>Z</i>                           | P2 <sub>1</sub> /c, 4 | I-4, 8           | P -1, 2               | P2 <sub>1</sub> /c, 4 | P -1, 4                     | P2 <sub>1</sub> /c, 4        |
| <i>a</i> , Å                                    | 10.0763(2)            | 19.4398(5)       | 5.6138(3)             | 4.06532(16)           | 6.8676(9)                   | 4.0639(1)                    |
| <i>b</i> , Å                                    | 11.2448(2)            | 19.4398(5)       | 7.8625(4)             | 24.0246(11)           | 11.0423(10)                 | 23.333(1)                    |
| <i>c</i> , Å                                    | 7.2619(2)             | 5.05770(10)      | 11.1133(5)            | 9.7176(4)             | 13.0715(11)                 | 10.0221(4)                   |
| $\alpha$ , °                                    | 90                    | 90               | 104.330(2)            | 90                    | 82.581(7)                   | 90                           |
| $\beta$ , °                                     | 91.0130(10)           | 90               | 96.117(2)             | 96.002(4)             | 74.932(9)                   | 93.341(3)                    |
| $\gamma$ , °                                    | 90                    | 90               | 94.399(3)             | 90                    | 77.837(9)                   | 90                           |
| Volume, Å <sup>3</sup>                          | 822.69(3)             | 1911.33(11)      | 469.84(4)             | 943.89(7)             | 932.79(18)                  | 948.71(6)                    |
| Density, g/cm <sup>3</sup>                      | 2.067                 | 1.905            | 1.987                 | 1.978                 | 2.144                       | 2.108                        |
| <i>T</i> , °K                                   | 200.(2)               | 200.(2)          | 200.(2)               | 100.02(19)            | 100.15                      | 170.01(10)                   |
| Crystal size, min x mid x max                   | 0.065 × 0.055 × 0.04  | 0.11 × 0.1 × 0.1 | 0.030 x 0.080 x 0.135 | 0.036 X 0.127 X 0.153 | 0.09 X 0.11 X 0.12          | 0.069 X 0.129 X 0.151        |
| X-ray wavelength, Å                             | 1.54178               | 1.54184          | 1.54184               | 1.54184               | 0.71073                     | 0.71073                      |
| $\mu$ , mm <sup>-1</sup>                        | 30.056                | 26.082           | 26.425                | 26.308                | 3.410                       | 3.353                        |
| Trans min / max                                 | 0.25 / 0.38           | 0.16 / 0.18      | 0.13 / 0.50           | 0.43858 / 1.00        | 0.647 / 1.00                | 0.41985 / 1.00               |
| $\theta_{min}$ , °                              | 4.39                  | 4.55             | 4.14                  | 3.680                 | 2.586                       | 2.21                         |
| $\theta_{max}$ , °                              | 69.83                 | 70.32            | 70.02                 | 72.120                | 26.369                      | 33.58                        |
| Reflections                                     |                       |                  |                       |                       |                             |                              |
| collected                                       | 5730                  | 4548             | 6165                  | 2731                  | 10762                       | 11750                        |
| independent                                     | 1501                  | 1611             | 1643                  | 2731                  | 3815                        | 3206                         |
| observed                                        | 1416                  | 1557             | 1566                  | 2644                  | 3414                        | 2656                         |
| R <sub>int</sub>                                | 0.0270                | 0.0538           | 0.0491                | 0.095                 | 0.0415                      | 0.0262                       |
| Threshold expression                            | > 2 $\sigma(I)$       | > 2 $\sigma(I)$  | > 2 $\sigma(I)$       | > 2 $\sigma(I)$       | > 2 $\sigma(I)$             | > 2 $\sigma(I)$              |
| No. parameters                                  | 100                   | 111              | 118                   | 119                   | 489                         | 128                          |
| No. restraints                                  | 0                     | 0                | 0                     | 0                     | 478                         | 0                            |
| R <sub>1</sub> (observed)                       | 0.0265                | 0.0390           | 0.0392                | 0.0429                | 0.0539                      | 0.0345                       |
| wR <sub>2</sub> (all)                           | 0.0687                | 0.1006           | 0.1053                | 0.1271                | 0.1193                      | 0.0835                       |
| Goodness of fit (all)                           | 1.061                 | 1.028            | 1.041                 | 1.105                 | 1.106                       | 1.0409                       |
| $\rho_{max}$ , $\rho_{min}$ , e Å <sup>-3</sup> | 1.04/-1.19            | 1.19/-1.26       | 1.144, -0.992         | 1.532, -0.717         | 1.485, -1.378               | 1.8023, -1.3657              |
| Completeness to 2 $\theta$ limit                | 0.963                 | 0.967            | 0.922                 | 0.997                 | 0.995                       | 0.8529                       |

## 5 References:

1. We acknowledge the NSF-MRI grant CHE-2018414, which was used to purchase the single-crystal X-ray diffractometer and associated software employed in this study.
2. We acknowledge the NSF-MRI grant CHE-0923449, which was used to purchase the single-crystal X-ray diffractometer and associated software employed in this study
3. Dolomanov, O. V.; Bourhis, L. J.; Gildea, R. J.; Howard, J. A. K.; Puschmann, H., OLEX2: a complete structure solution, refinement and analysis program. *Journal of Applied Crystallography* **2009**, *42* (2), 339-341.
4. Sheldrick, G., SHELXT - Integrated space-group and crystal-structure determination. *Acta Crystallographica Section A* **2015**, *71* (1), 3-8.
5. Sheldrick, G., Crystal structure refinement with SHELXL. *Acta Crystallographica Section C* **2015**, *71* (1), 3-8.
6. He, Y.; Xie, Y.-y.; Wang, Y.-c.; Bin, X.-m.; Hu, D.-c.; Wang, H.-s.; Pan, Y.-m., TEMPO-catalyzed synthesis of 5-substituted isoxazoles from propargylic ketones and TMSN<sub>3</sub>. *RSC Advances* **2016**, *6* (64), 58988-58993.
7. Bowden, K.; Heilbron, I. M.; Jones, E. R. H.; Weedon, B. C. L., 13. Researches on acetylenic compounds. Part I. The preparation of acetylenic ketones by oxidation of acetylenic carbinols and glycols. *Journal of the Chemical Society (Resumed)* **1946**, (0), 39-45.
8. Hofmeister, H.; Annen, K.; Laurent, H.; Wiechert, R., A Novel Entry to 17 $\alpha$ -Bromo- and 17 $\alpha$ -Iodoethynyl Steroids. *Angewandte Chemie International Edition in English* **1984**, *23* (9), 727-729.
